# Supplementary material for: The Gut Microbiome and Metabolome of Two Riparian Communities in the Amazon
Source: Front Microbiol. 2019 Sep 4;10:2003. doi: 10.3389/fmicb.2019.02003 (PMC6737013; doi:10.3389/fmicb.2019.02003)
Supplement: Supplementary file 14 [file Table_3.XLSX]

## Sheet: Table S3A
Table S3A: Taxonomic composition of the core microbiome.
Phylum	Number of OTUs	Number of sequences	Class	Number of OTUs	Number of sequences	Family	Number of OTUs	Number of sequences	Genus	Number of OTUs	Number of sequences
Actinobacteria	17	71062	Actinobacteria	8	45691	Bifidobacteriaceae	8	45691	na	8	45691
			Coriobacteriia	9	25371	Coriobacteriaceae	9	25371	na	5	13093
									Collinsella	3	8853
									Slackia	1	3425
Bacteroidetes	200	1058613	Bacteroidia	200	1058613	na	11	26589	na	11	26589
						Barnesiellaceae	1	4306	na	1	4306
						Odoribacteraceae	9	5916	Butyricimonas	7	4116
									Odoribacter	2	1800
						Paraprevotellaceae	14	81133	na	13	78630
									CF231	1	2503
						Bacteroidaceae	69	312153	Bacteroides	69	312153
						Porphyromonadaceae	16	11638	Parabacteroides	16	11638
						Prevotellaceae	69	539780	Prevotella	69	539780
						Rikenellaceae	7	18471	na	7	18471
						S24-7	4	58627	na	4	58627
Cyanobacteria	2	3003	4C0d	2	3003	na	2	3003	na	2	3003
Elusimicrobia	1	2000	Elusimicrobia	1	2000	Elusimicrobiaceae	1	2000	na	1	2000
Firmicutes	590	1404102	Bacilli	9	16449	Enterococcaceae	1	206	Enterococcus	1	206
						Lactobacillaceae	1	9346	Lactobacillus	1	9346
						Streptococcaceae	6	6565	Lactococcus	1	262
									Streptococcus	5	6303
						Turicibacteraceae	1	332	Turicibacter	1	332
			Clostridia	561	1266377	na	88	158803	na	88	158803
						Mogibacteriaceae	2	820	na	2	820
						Tissierellaceae	1	283	WAL_1855D	1	283
						Christensenellaceae	11	13517	na	11	13517
						Clostridiaceae	15	21736	na	8	10222
									Clostridium	6	11287
									SMB53	1	227
						Lachnospiraceae	132	227975	na	82	137620
									Anaerostipes	2	1244
									Blautia	9	10709
									Butyrivibrio	1	12325
									Coprococcus	13	27107
									Dorea	7	6789
									Lachnospira	5	6833
									Roseburia	13	25348
						Ruminococcaceae	267	573385	na	206	370915
									Faecalibacterium	17	124523
									Oscillospira	20	30394
									Ruminococcus	24	47553
						Veillonellaceae	45	269858	Dialister	21	188757
									Megamonas	1	16767
									Megasphaera	14	54225
									Mitsuokella	1	3093
									Phascolarctobacterium	5	5711
									Veillonella	3	1305
			Erysipelotrichi	20	121276	Erysipelotrichaceae	20	121276	na	2	1584
									Eubacterium	6	43516
									Bulleidia	1	984
									Catenibacterium	11	75192
Fusobacteria	2	2229	Fusobacteriia	2	2229	Fusobacteriaceae	2	2229	Cetobacterium	1	1423
									Fusobacterium	1	806
Lentisphaerae	1	289	Lentisphaeria	1	289	Victivallaceae	1	289	na	1	289
Proteobacteria	44	180932	Alphaproteobacteria	1	1293	RF32	1	1293	na	1	1293
			Betaproteobacteria	6	18834	Alcaligenaceae	4	18169	Sutterella	4	18169
						Oxalobacteraceae	2	665	Oxalobacter	2	665
			Deltaproteobacteria	11	34045	Desulfovibrionales	11	34045	na	1	204
									Bilophila	3	12256
									Desulfovibrio	7	21585
			Gammaproteobacteria	26	126760	Succinivibrionaceae	2	24725	Succinivibrio	2	24725
						Enterobacteriaceae	18	76560	na	18	76560
						Pasteurellaceae	6	25475	Aggregatibacter	1	458
									Haemophilus	4	23940
									Acinetobacter	1	1077
Tenericutes	33	72020	Mollinicultes	32	69399	na	32	69399	na	32	69399
			RF3	1	2621	na	1	2621	na	1	2621
Verrucomicrobia	3	16902	Verruco-5	1	437	RFP12	1	437	na	1	437
			Verrucomicrobiae	2	16465	Verrucomicrobiaceae	2	16465	Akkermansia	2	16465
Total	893	2811152	Total	893	2811152	Total	893	2811152	Total	893	2811152
na: unknown affiliation

## Sheet: Table S3B
Table S3B: Taxonomic composition of OTUs found exclusively in individuals from Buiuçu.
Phylum	Number of OTUs	Number of sequences	Class	Number of OTUs	Number of sequences	Family	Number of OTUs	Number of sequences	Genus	Number of OTUs	Number of sequences
Bacteroidetes	1	375	Bacteroidia	1	375	Rikenellaceae	1	375	na	1	375
Cyanobacteria	1	643	4C0d-2	1	643	na	1	643	na	1	643
Firmicutes	6	2112	Clostridia	4	1546	na	1	187	na	1	187
						Clostridiaceae	1	479	na	1	479
						Ruminococcaceae	2	566	na	1	423
									Ruminococcus	1	457
			Erysipelotrichi	2	566	Erysipelotrichaceae	2	566	Bulleidia	1	267
Proteobacteria	1	243	Alphaproteobacteria	1	243	na	1	243	na	1	243
Spirochaetes	1	14191	Spirochaetes	1	14191	Spirochaetaceae	1	14191	Treponema	1	14191
Tenericutes	4	1204	Mollicutes	4	1204	na	4	1204	na	4	1204
Total	14	18768	Total	14	18768	Total	14	18454	Total	13	18469
na: unknown affiliation

## Sheet: Table S3C
Table S3C: Taxonomic composition of OTUs found exclusively in individuals from Puruzinho
Phylum	Number of OTUs	Number of sequences	Class	Number of OTUs	Number of sequences	Family	Number of OTUs	Number of sequences	Genus	Number of OTUs	Number of sequences
Bacteroidetes	2	1064	Bacteroidia	2	1064	Paraprevotellaceae	1	790	na	1	790
						Prevotellaceae	1	274	Prevotella	1	274
Firmicutes	1	446	Clostridia	1	446	Veillonellaceae	1	446	Megamonas	1	446
Total	3	1510	Total	3	1510	Total	3	1510	Total	3	1510
na: unknown affiliation

## Sheet: Table S3D
Table S3D: Taxonomic composition of OTUs found exclusively in individuals from Rio de Janeiro
Phylum	Number of OTUs	Number of sequences	Class	Number of OTUs	Number of sequences	Family	Number of OTUs	Number of sequences	Genus	Number of OTUs	Number of sequences
Bacteroidetes	43	26804	Bacteroidia	43	26804	Barnesiellaceae	3	841	na	3	841
						Paraprevotellaceae	2	430	Paraprevotella	2	430
						Bacteroidaceae	26	18322	Bacteroides	26	18322
						Prevotellaceae	1	312	Prevotella	1	312
						Rikenellaceae	6	2184	na	6	2184
						S24-7	5	4715	na	5	4715
Firmicutes	6	2357	Bacilli	6	2357	Christensenellaceae	2	587	na	2	587
						Veillonellaceae	4	1770	Acidaminococcus	4	1770
Proteobacteria	1	197	Betaproteobacteria	1	197	Alcaligenes	1	197	Sutterella	1	197
Synergistetes	1	198	Synergistia	1	198	Synergistaceae	1	198	na	1	198
Tenericutes	1	1415	Mollicutes	1	1415	na	1	1415	na	1	1415
Total	52	30971	0	52	30971	0	52	30971	0	52	30971
na: unknown affiliation
